# Supplementary material for: Variability in ‘Capri’ Everbearing Strawberry Quality during a Harvest Season
Source: MDPI journal article supplement (doi:10.3390/foods12061349), 2023-03-22
Supplement: s1 [file s1]

Supplementary Material: Figure S1. Sorting of strawberries at harvest

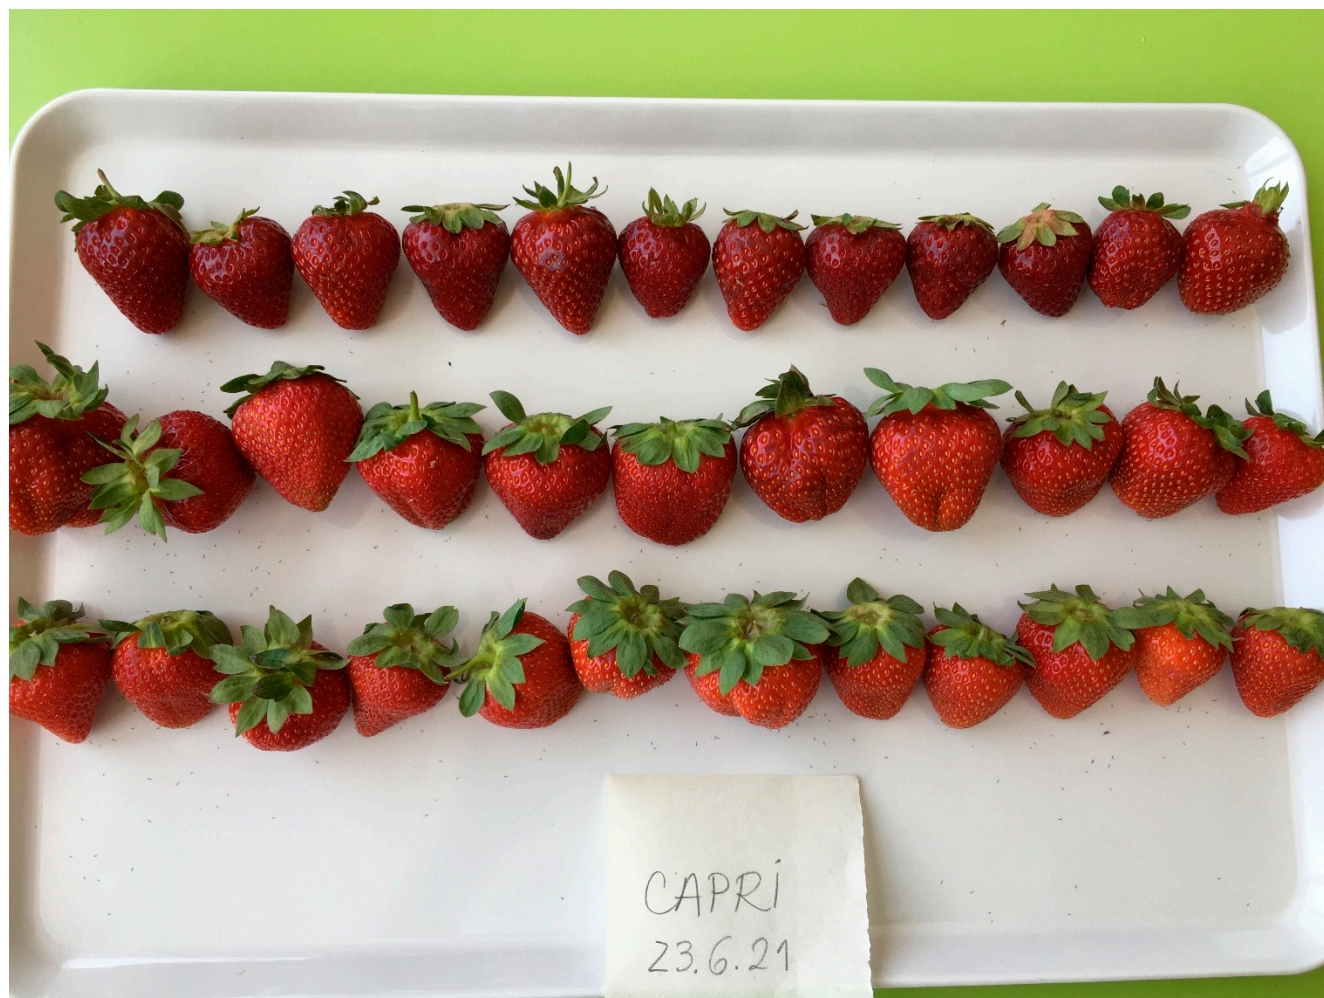

**Supplementary Material: Table S1. Identification of phenolic compounds and the standards used to express them**

| <i>Positive mode [M]<sup>+</sup></i> |                                      |          |                |                        |                       |  |  |                            |              |
|--------------------------------------|--------------------------------------|----------|----------------|------------------------|-----------------------|--|--|----------------------------|--------------|
| Peak No                              | Anthocyanin                          | Rt (min) | $\lambda$ [nm] | [M] <sup>+</sup> (m/z) | MS <sup>2</sup> (m/z) |  |  | Expressed as               | Group        |
| 1A                                   | cyanidin 3-O-glucoside               | 9.91     | 530            | 449                    | 287                   |  |  | Cyanidin-3-O-glucoside     | Anthocyanins |
| 2A                                   | pelargonidin 3-O-glucoside           | 11.20    | 530            | 433                    | 271                   |  |  | Pelargonidin-3-O-glucoside | Anthocyanins |
| 3A                                   | pelargonidin 3-O-rutinoside          | 11.60    | 530            | 579                    | 271, 433              |  |  | Pelargonidin-3-O-glucoside | Anthocyanins |
| 4A                                   | pelargonidin-3-(6''malonyl)glucoside | 15.61    | 530            | 519                    | 271, 475, 433         |  |  | Pelargonidin-3-O-glucoside | Anthocyanins |
| 5A                                   | 5-pyranopelargonidin-3-glucoside     | 16.13    | 530            | 501                    | 339                   |  |  | Pelargonidin-3-O-glucoside | Anthocyanins |
| 6A                                   | pelargonidin-3-O-acetylglucoside     | 16.71    | 530            | 475                    | 271                   |  |  | Pelargonidin-3-O-glucoside | Anthocyanins |

  

| <i>Negative mode [M-H]<sup>-</sup></i> |                                  |          |                |                          |                       |                          |                       |                          |                                  |
|----------------------------------------|----------------------------------|----------|----------------|--------------------------|-----------------------|--------------------------|-----------------------|--------------------------|----------------------------------|
| Peak No                                | Phenolic compound                | Rt (min) | $\lambda$ [nm] | [M-H] <sup>-</sup> (m/z) | MS <sup>2</sup> (m/z) | MS <sup>3</sup> (m/z)    | MS <sup>4</sup> (m/z) | Expressed as             | Group                            |
| 1                                      | <i>p</i> -coumaric hexoside      | 13.08    | 280, 350       | 325                      | 163,145, 119          |                          |                       | <i>p</i> -coumaric acid  | Hydroxycinnamic acid derivatives |
| 2                                      | <i>p</i> -coumaric hexoside der. | 13.60    | 280, 350       | 371                      | 325                   | 163, 145, 119            |                       | <i>p</i> -coumaric acid  | Hydroxycinnamic acid derivatives |
| 3                                      | 1-O-feruoylglucose               | 14.06    | 350            | 355                      | 193, 217, 175         |                          |                       | ferulic acid             | Hydroxycinnamic acid derivatives |
| 4                                      | propelargonidin dimer            | 15.10    | 280            | 561                      | 543, 435,289          |                          |                       | procyanidin B1           | Flavanol                         |
| 5                                      | brevifolin carboxylic acid       | 15.33    | 280, 350       | 291                      | 247                   | 219, 191, 203, 175       | 191                   | ellagic acid             | Hydroxybenzoic acid derivatives  |
| 6                                      | ferulic acid hexoside der.       | 16.14    | 280, 350       | 499                      | 455, 293              | 265, 264, 237            | 237                   | ferulic acid             | Hydroxycinnamic acid derivatives |
| 7                                      | apigenin-7-O-glucoside           | 16.58    | 280            | 431                      | 269                   | 147, 241, 225            |                       | apigenin-7-glucoside     | Flavonols                        |
| 8                                      | ferulic acid hexoside der.       | 16.80    | 280, 350       | 449                      | 355, 269, 193         |                          |                       | ferulic acid             | Hydroxycinnamic acid derivatives |
| 9                                      | ellagic acid der.                | 17.99    | 280            | 479                      | 301, 300, 433         | 257, 229, 185            |                       | ellagic acid             | Hydroxybenzoic acid derivatives  |
| 10                                     | galloyl-bis-HHDP-glucose         | 18.40    | 280            | 935                      | 633, 301              | 257, 229, 185, 284       |                       | ellagic acid             | Hydroxybenzoic acid derivatives  |
| 12                                     | ellagic acid-O-deoxyhexoside     | 19.33    | 280, 350       | 447                      | 301, 300              | 257, 229                 |                       | ellagic acid             | Hydroxybenzoic acid derivatives  |
| 13                                     | tormentic acid                   | 19.63    | 280            | 487                      | 441, 339, 293         | 293, 149, 147            | 191, 101              | ellagic acid             | not phenolic compound            |
| 14                                     | ellagic acid-O-deoxyhexoside     | 19.85    | 350            | 447                      | 301, 300              | 257, 229                 |                       | ellagic acid             | Hydroxybenzoic acid derivatives  |
| 15                                     | cinnamic acid-3-O-hexoside       | 21.09    | 280, 350       | 355                      | 309, 147, 207, 248    |                          |                       | caffeic acid             | Hydroxycinnamic acid derivatives |
| 16                                     | isoquercetin                     | 21.35    | 350            | 463                      | 301, 300              | 179, 151                 |                       | quercetin-3-glucoside    | Flavonols                        |
|                                        |                                  |          |                |                          |                       | 257, 267, 241, 229, 213, |                       |                          |                                  |
| 17                                     | <i>trans</i> -tiliroside         | 21.75    | 350            | 593                      | 285                   | 197                      |                       | kaempferol-3-glucoside   | Flavonols                        |
| 18                                     | quercetin-3-O-glucuronide        | 22.26    | 280, 350       | 477                      | 301                   | 179, 151                 |                       | quercetin-3-glucoside    | Flavonols                        |
| 19                                     | kaempferol-O-hexoside            | 22.70    | 350            | 447                      | 284, 285              |                          |                       | kaempferol-3-glucoside   | Flavonols                        |
| 20                                     | quercetin der.                   | 22.98    | 280            | 619                      | 499, 521              | 301, 323                 | 179, 151              | quercetin-3-glucoside    | Flavonols                        |
| 21                                     | kaempferol-3-O-glucuronide       | 23.51    | 280, 350       | 461                      | 285                   | 257, 267, 241            |                       | kaempferol-3-glucoside   | Flavonols                        |
| 22                                     | caffeoylglucaric isomer der.     | 24.26    | 280            | 417                      | 371                   |                          |                       | caffeic acid             | Hydroxycinnamic acid derivatives |
| 23                                     | isorhamnetin-O-hexoside der.     | 24.53    | 350            | 477                      | 315, 379              |                          |                       | isorhamnetin-3-glucoside | Flavonols                        |
| 24                                     | kaempferol-O-acetylhexoside      | 25.20    | 350            | 489                      | 285                   | 257, 267, 241            |                       | kaempferol-3-glucoside   | Flavonols                        |

Rt, retention time; der., derivative; HHDP, hexahydroxydiphenoyl; [M-H]<sup>-</sup>, pseudo-molecular ion identified in negative ion mode; [M]<sup>+</sup>, pseudo-molecular ion identified in positive ion mode ion.
